# Supplementary material
Source: PubMed Central journal article supplement (PMC3438293)
Supplement: NIHMS393361-supplement-01.pdf [file NIHMS393361-supplement-01.pdf]

# Supplementary Figure 1

## Schematic representation of the solid-phase micro extraction fiber system

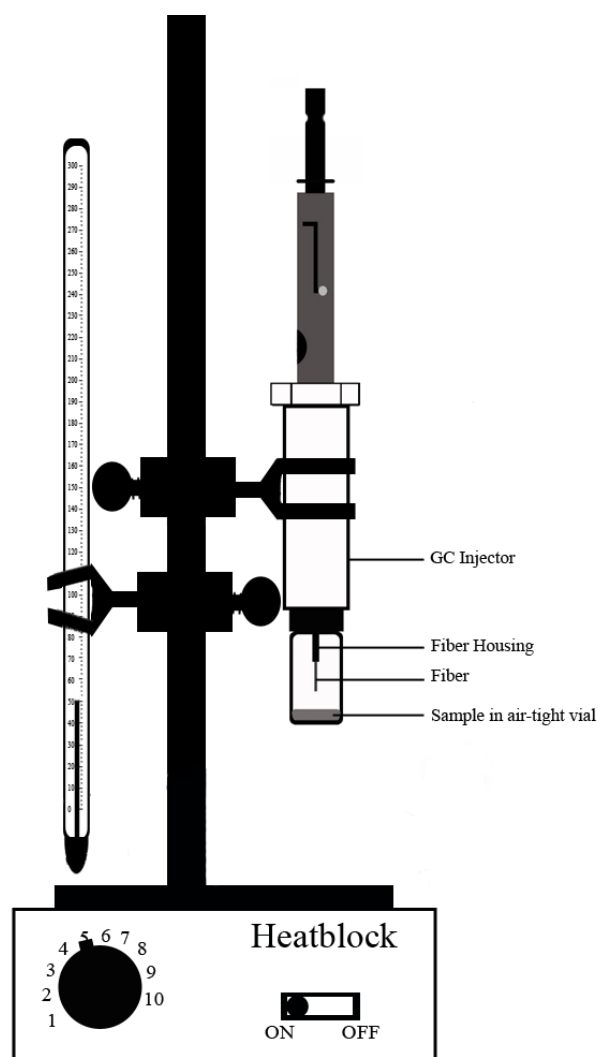

The solid-phase micro extraction (SPME) fiber holder is attached to the needle of the gas chromatograph instrument (GC) injector. During the acidic hydrolysis and dehydration of the sample, the needle is inside the sealed air-tight vial heated at 50 °C. After incubation for 1 h, the fiber was retracted into the needle, the holder was removed and the needle was introduced into the injection port of the GC instrument for analysis of the adsorbed isoprene. The scheme shows the setting before introducing the vial into the heating block.
