# Supplementary material
Source: PubMed Central journal article supplement (PMC3438293)

## Supplementary Fig. 4

Three standard curves were constructed by non-enzymatic hydrolysis of mixtures containing:

- 1) Increasing amounts of DMAPP
- 2) Increasing amounts of IPP
- 3) Increasing amounts of DMAPP and decreasing amounts of IPP

We used a mix of IPP and DMAPP to mimic the situation of enzymatic reactions in which increasing amounts of IPP were transformed into DMAPP, but still there was a mix of both compounds in the solution that was hydrolyzed by phosphoric acid. A linear increase in non-enzymatic generation of isoprene formation was observed as the amount of DMAPP was increased and IPP decreased.

- 4) The DMAPP standard curve was adjusted for IPP interference and developed into a corrected DMAPP standard curve that was used for product quantification.

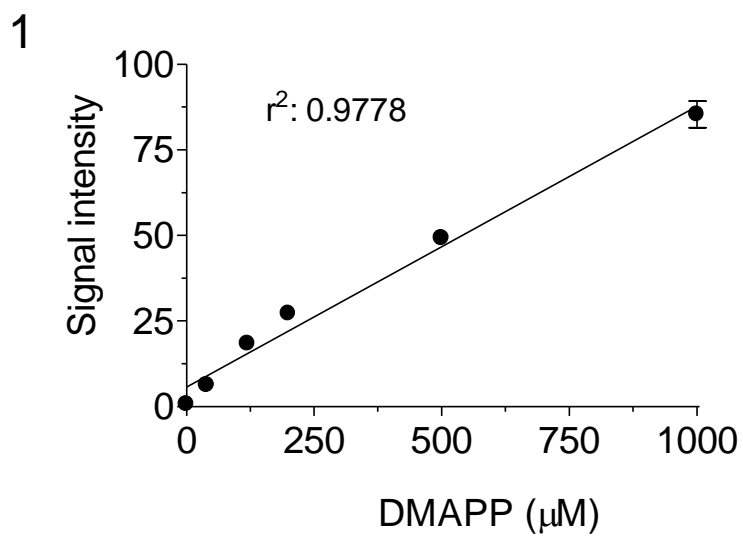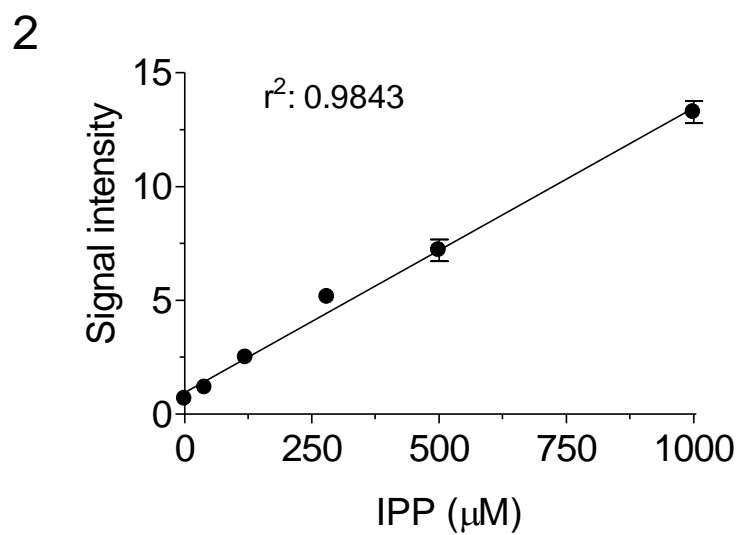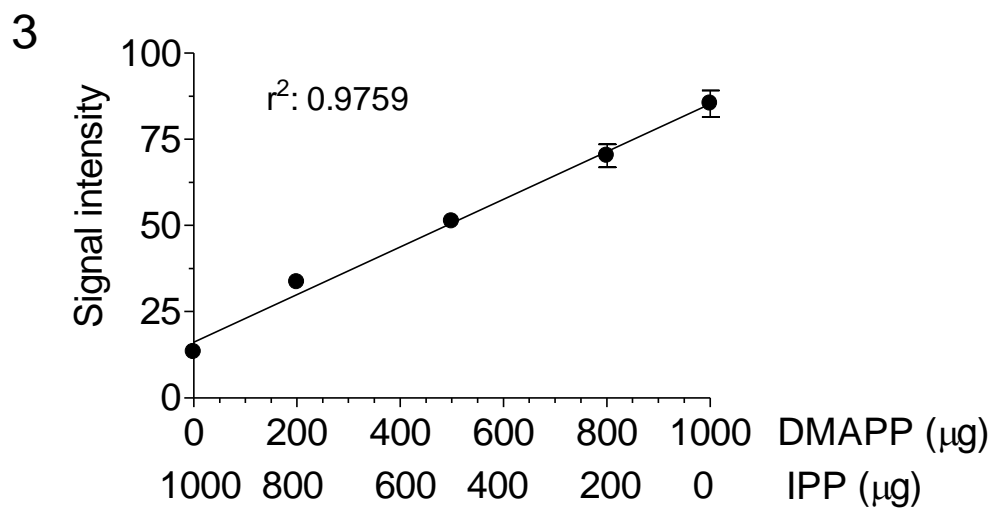

4

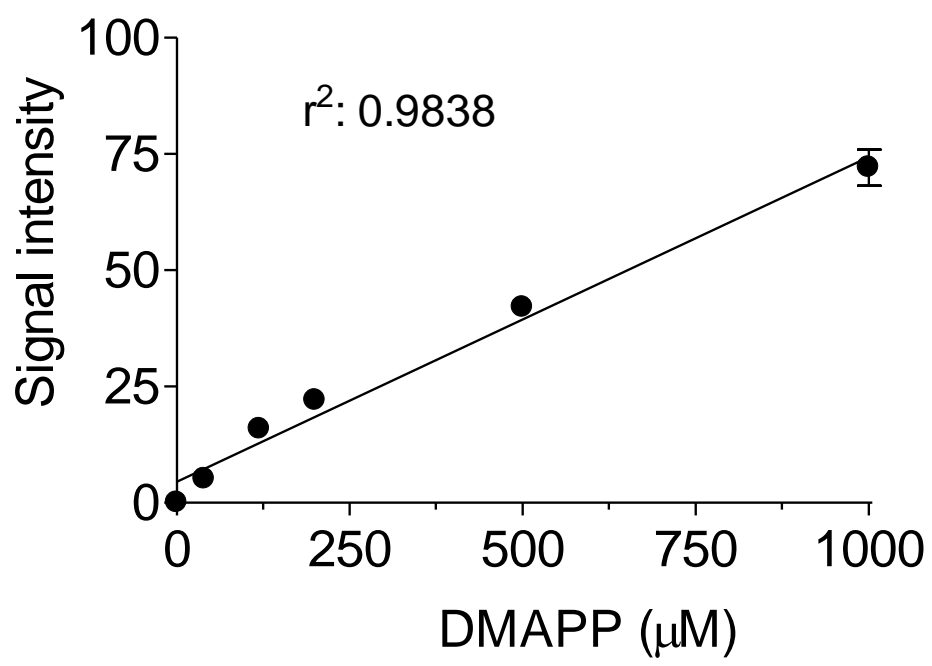

Supplement: NIHMS393361-supplement-04.pdf [file NIHMS393361-supplement-04.pdf]
