# Supplementary material
Source: PubMed Central journal article supplement (PMC3438293)

### Supplementary Figure 5

Michaelis constants,  $K_m$ ,  $V_{max}$  and  $k_{cat}$ , for the purified recombinant AaIPPI were calculated by non-linear regression analysis using GraphPad Prism 3.03 software. Figure shows the Lineweaver-Burk double reciprocal plot for AaIPPI at different IPPI concentrations.

$$K_m (\mu\text{mol/L}) = 276.8$$

$$V_{max} (\text{umol/mg min}) = 0.60$$

$$\frac{1}{2} V_{max} = 0.3$$

$$k_{cat} = V_{max}/[E] = 1500$$

$$k_{cat} \text{ 1/s} = 25$$

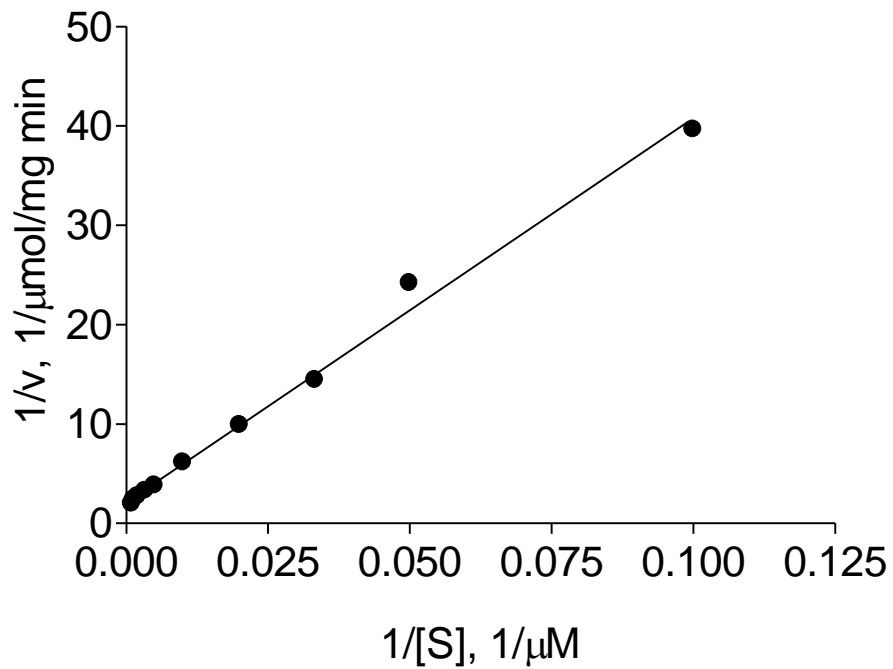

Supplement: NIHMS393361-supplement-05.pdf [file NIHMS393361-supplement-05.pdf]
