# Supplementary material
Source: PubMed Central journal article supplement (PMC3438293)

## Supplementary Figure 6

**Modeling *A. aegypti* IPPI:** The tertiary structure model of the AeIPPI was created using the protein structure homology-modeling server Swiss v.8.05 (Arnold et al., 2006; Schwede et al., 2003) using as template the Human type I IPP isomerase (2i6kA) that share a similarity of 46.6%. The QMEAN6 (Benkert et al., 2011) score obtained for the model obtained was 0.720, the secondary structure agreement 80.0% and the solvent agreement accessibility 82.3%.

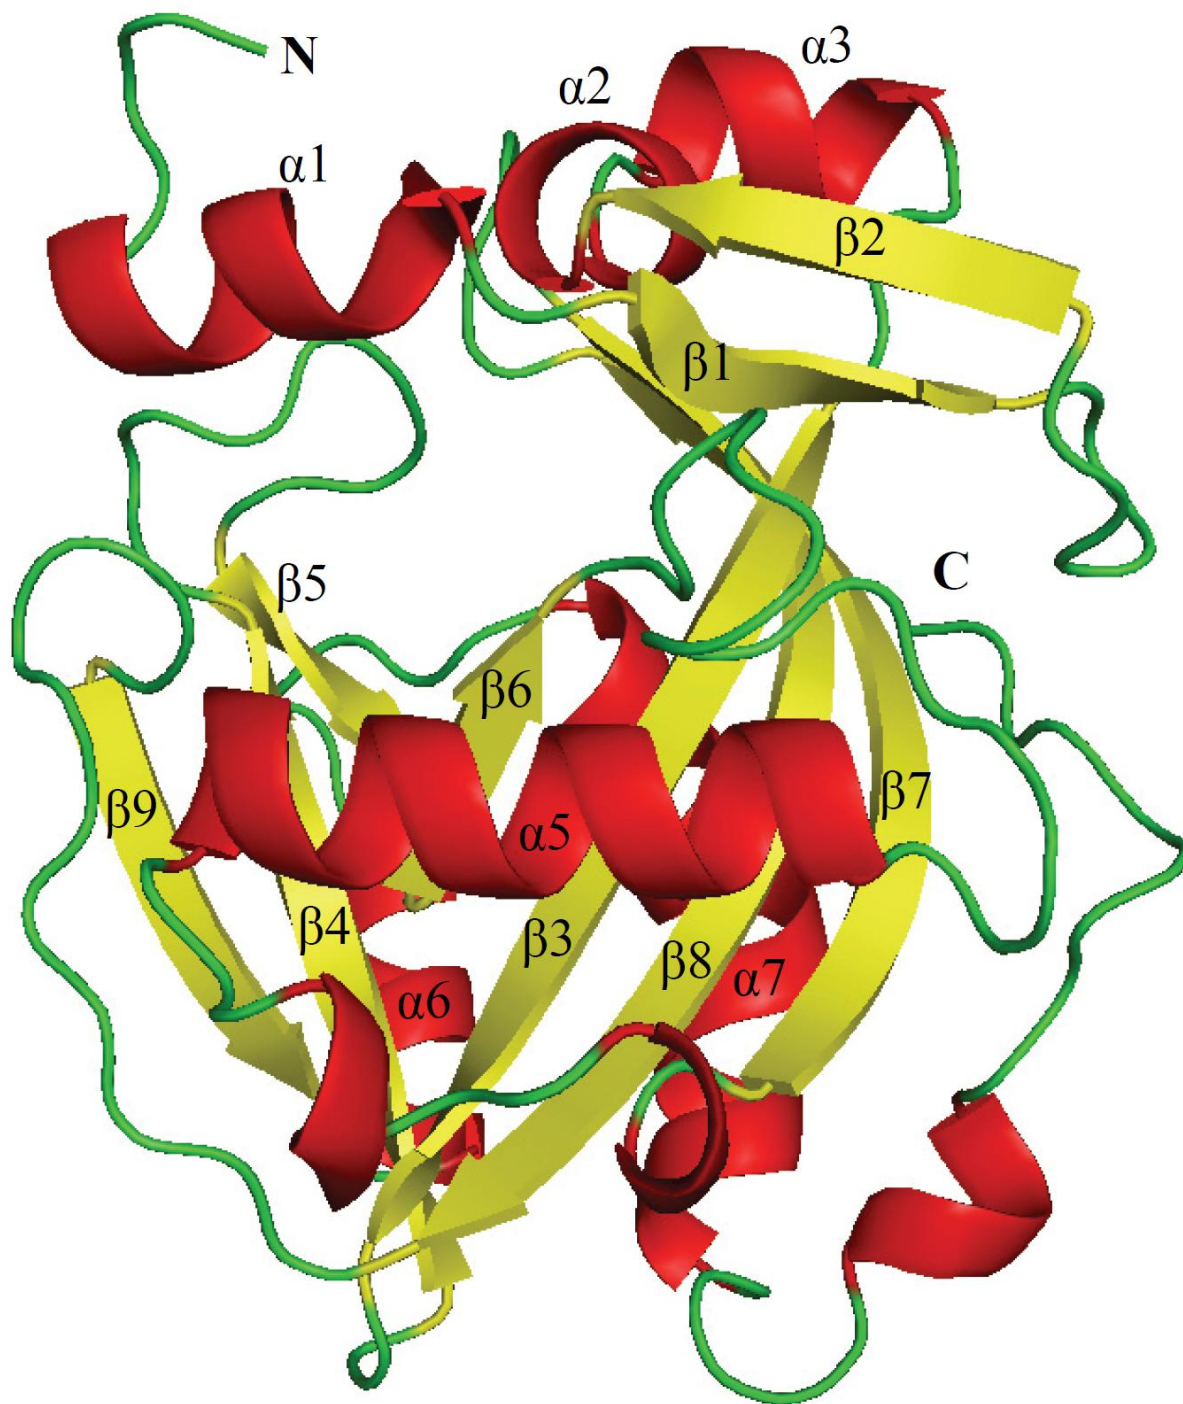

Supplement: NIHMS393361-supplement-06.pdf [file NIHMS393361-supplement-06.pdf]
