# Supplementary material
Source: PubMed Central journal article supplement (PMC3438293)
Supplement: NIHMS393361-supplement-07.pdf [file NIHMS393361-supplement-07.pdf]

**Supplementary Table 1:** Accession numbers and primer probe sequences for the IPPI gene and the housekeeping gene 60S ribosomal protein L32. Numbers in the second column refer to the position of the enzymes in the pathway as shown in Fig. 1.

| <b>Gene</b>  | <b>#</b> | <b>Accession #</b> | <b>Primer forward (5' → 3')</b> | <b>Primer reverse (5' → 3')</b> | <b>Probe (5' → 3')</b> |
|--------------|----------|--------------------|---------------------------------|---------------------------------|------------------------|
| <b>IPPI</b>  | 7        | AAEL006144         | CGAGCTGGGAATCCCGTT              | CGCGTGAGGAAATGGAAGTTT<br>T      | CCGGGCGTACCTGACT       |
| <b>rpL32</b> |          | AAEL003396         | CCATCAGTCCGATCGCTATGA           | GTTGTCAATACCTTTCGGCTT<br>ACG    | CAAGCTTGCCCCAAC<br>TG  |
